# Supplementary material for: Nest-site selection, reproductive ecology and shifts within core-use areas of Black-necked Cranes at the northern limit of the Tibetan Plateau
Source: PeerJ. 2017 Jan 31;5:e2939. doi: 10.7717/peerj.2939 (PMC5289107; doi:10.7717/peerj.2939)
Supplement: Video S9 — in Yanchiwan National Nature Reserve, Gansu, China [file peerj-05-2939-s016.xlsx]

## Sheet: nest and site characteristics
year	Numbers in each year	number of nests	nest types (haystack 1; ground 2)	nest length (cm)	nest width (cm)	nest height (cm)	nest habitats (river 1; lake 2; swamp 1)	distance to the nearest hill (longer than 100m,1;shorter than 100m, 2)	water area (<500 m2,1; >500 m2, 2)	distance to the nearest land (m)	disturbance level (strong 2; weak 1)	water depth (cm)	successful(1) unsuccessful(2）	nest with at least one egg hatched (1); nest failed (2)
13	1	1	1	140	125	17	2	1	2	22	1	42	1	1
13	2	2	2	96	87	5	2	1	2	20	1	53	1	1
13	3	3	1	105	84	9	3	2	2	5	2	25	1	1
13	4	4	1	105	98	20	2	1	2	16	1	63	1	1
13	5	5	1	84	95	13	1	2	1	5	2	27	1	2
13	6	6	1	92	81	12	1	2	2	20	1	36	1	1
13	7	7	1	90	97	22	3	2	1	5	2	15	2	2
13	8	8	1	110	102	12	2	1	2	19	2	19	1	1
13	9	9	1	130	114	12	3	2	1	7	2	13	2	2
14	1	10	1	95	92	17	1	2	2	14	2	36	1	1
14	2	11	1	170	140	22	3	2	2	4	2	38	1	2
14	3	12	1	110	90	26	2	2	2	20	1	57	1	1
14	4	13	1	100.5	100	19	3	2	2	10	1	36	1	1
14	5	14	1	112.5	102.5	20	3	2	1	3	2	19	1	1
14	6	15	2	95	90	9	2	2	2	9	1	73	1	2
14	7	16	1	130	120.5	21	2	1	2	10	1	65	1	1
14	8	17	1	130	118	18	2	1	2	12	2	26	2	2
14	9	18	1	100	90	12	3	2	1	0	2	11	2	2
14	10	19	1	94	89	10	2	1	2	20	1	52	1	1
15	1	20	2	150	130	8	2	1	2	21	1	56	1	1
15	2	21	1	150	120	23	3	2	2	5	2	26	1	1
15	3	22	1	110	95	20	2	1	2	24	1	50	1	1
15	4	23	1	110	100	14	1	2	2	12	2	27	2	2
15	5	24	1	90	75	45	1	2	2	8	2	25	1	2
15	6	25	2	85	85	13	2	2	2	10	1	68	1	1
15	7	26	1	120	110	24	3	2	2	5	2	15	1	1
15	8	27	1	120	110	35	1	2	2	7	2	25	1	1
15	9	28	2	95	90	25	3	2	1	0	2	12	2	2
15	10	29	1	99	90	20	2	2	2	30	1	45	1	1

## Sheet: food
number	habitats (Mudflat 1; Swamp 2; Saline-alkali 3)	density (ind/m2)		number	habitats (Mudflat 1; Swamp 2; Saline-alkali 3)	quality (g)
1	1	2750		1	1	0.189744
2	1	2600		2	1	0.121053
3	1	2050		3	1	0.148718
4	1	1950		4	1	0.288462
5	1	1950		5	1	0.182609
6	1	1900		6	1	0.0913043
7	1	1600		7	1	0.2
8	1	1533.33		8	1	0.190476
9	1	1300		9	1	0.138636
10	1	1300		10	1	0.142424
11	1	1150		11	1	0.138462
12	1	1150		12	1	0.104412
13	1	866.667		13	1	0.542857
14	1	733.333		14	1	0.323077
15	1	420		15	1	0.126923
16	1	1040		16	1	0.12439
17	1	120		17	1	0.241026
18	1	260		18	1	0.180769
19	1	2200		19	1	0.18
20	1	2000		20	1	0.1625
21	1	700		21	1	0.119149
22	1	2540		22	1	0.18
23	1	540		23	1	0.1
24	1	1160		24	1	0.1125
25	1	600		25	1	0.103846
26	1	1380		26	1	0.185714
27	1	60		27	1	0.22
28	1	2600		28	1	0.184615
29	1	1760		29	1	0.166667
30	1	566.667		30	1	0.38
31	1	525		31	1	0.375
32	1	400		32	2	0.125
33	1	320		33	2	0.13125
34	1	20		34	2	0.12
35	1	40		35	2	0.258333
36	1	1840		36	2	0.0538462
37	1	940		37	2	0.0981481
38	1	1280		38	2	0.169048
39	1	740		39	2	0.133333
40	1	360		40	2	0.187179
41	1	520		41	2	0.168421
42	1	900		42	2	0.133333
43	1	1840		43	2	0.171429
44	2	3900		44	2	0.12
45	2	433.333		45	2	0.104348
46	2	3000		46	2	0.263636
47	2	2700		47	2	0.107692
48	2	1766.67		48	2	0.231579
49	2	1400		49	2	0.255556
50	2	1350		50	2	0.2
51	2	1300		51	2	0.141667
52	2	1266.67		52	2	0.2
53	2	1200		53	2	0.1
54	2	1066.67		54	2	0.2
55	2	875		55	2	0.316667
56	2	833.333		56	2	0.209091
57	2	800		57	2	0.1
58	2	766.667		58	2	0.0947368
59	2	766.667		59	2	0.0934783
60	2	733.333		60	2	0.0941176
61	2	650		61	2	0.0962963
62	2	633.333		62	2	0.12
63	2	633.333		63	2	0.0913043
64	2	625		64	2	0.245455
65	2	600		65	2	0.17
66	2	600		66	2	0.2
67	2	600		67	2	0.141667
68	2	560		68	2	0.3
69	2	550		69	2	0.0773585
70	2	500		70	3	0.146154
71	2	400		71	3	0.08
72	2	400		72	3	0.0878049
73	2	375		73	3	0.0633333
74	2	325		74	3	0.0941176
75	2	300		75	3	0.16
76	2	300		76	3	0.125
77	2	300		77	3	0.135
78	2	275		78	3	0.127778
79	2	260		79	3	0.0703704
80	2	475		80	3	0.05
81	2	475		81	3	0.0655172
82	2	250		82	3	0.232143
83	2	240		83	3	0.185
84	2	200		84	3	0.0894737
85	2	260		85	3	0.115385
86	2	40		86	3	0.0836364
87	2	560		87	3	0.0666667
88	2	220		88	3	0.136364
89	2	40
90	2	80
91	3	700
92	3	666.667
93	3	650
94	3	500
95	3	375
96	3	375
97	3	300
98	3	300
99	3	266.667
100	3	260
101	3	125
102	3	100
103	3	100
104	3	20
105	3	240
106	3	120
107	3	60
108	3	460
109	3	320
110	3	520
111	3	140
112	3	160
113	3	60
114	3	860
115	3	60
116	3	140
